# Supplementary material
Source: publisher site journal article supplement (https://www.degruyterbrill.com/publication/isbn/9783839418611/downloadAsset/9783839418611_Leseprobe.pdf)
Supplement: Supplementary file 1 [file 9783839418611_Leseprobe.pdf]

**Aus:**

**MICHAEL RÖSSNER, HEIDEMARIE UHL (Hg.)**

**Renaissance der Authentizität?**

**Über die neue Sehnsucht nach dem Ursprünglichen**

Juni 2012, 298 Seiten, kart., 29,80 €, ISBN 978-3-8376-1861-7

Nach der Dekonstruktion der Vorstellungen von Echtheit, Eigentlichkeit und Ursprünglichkeit unter dem Vorzeichen des *Cultural Turn* erfährt Authentizität eine neue Konjunktur – sowohl in der theoretischen Auseinandersetzung als auch in der kulturellen Praxis.

Der Band widmet sich dieser neuen Sehnsucht nach dem Ursprünglichen und begreift sie als Herausforderung für die Kulturwissenschaften. Die Beiträge eröffnen den Dialog zwischen unterschiedlichen Authentizitäts-Konzepten und verbinden theoretische Positionsbestimmungen mit konkreten Anwendungsbereichen.

**Michael Rössner** (Prof. Dr. phil. Dr. iur.) ist Direktor des Instituts für Kulturwissenschaften und Theatergeschichte der Österreichischen Akademie der Wissenschaften und lehrt Romanistik an der Universität München.

**Heidemarie Uhl** (Doz. Mag. Dr. phil.) ist Historikerin am Institut für Kulturwissenschaften und Theatergeschichte der Österreichischen Akademie der Wissenschaften.

Weitere Informationen und Bestellung unter:

[www.transcript-verlag.de/ts1861/ts1861.php](http://www.transcript-verlag.de/ts1861/ts1861.php)

# Inhalt

---

## **Vorwort**

Michael Rössner, Heidemarie Uhl | 9

## **AUTHENTIZITÄT ODER AUTHENTIZITÄTEN – VARIATIONEN UND UNSCHÄRFEN DES AUTHENTIZITÄTSBEGRIFFS**

### **Zum Paradoxon von Zeugenschaft im Spannungsfeld von Personalität und Depersonalisierung**

Ein Kommentar über Authentizität in fünf Thesen

Sybille Krämer | 15

### **Authentizität – Signatur des abendländischen Sonderwegs?**

Aleida Assmann | 27

### **Die Abwendung von der Authentizität**

Postkoloniale Sichtweisen in neueren Romanen

Anil Bhatti | 43

### **Von der Charta von Venedig 1964 zum *Nara Document on Authenticity* 1994**

30 Jahre „Authentizität“ in Namen  
des kulturellen Erbes der Welt

Michael S. Falser | 63

### **Von der Suche nach dem Authentischen zur Dekonstruktion der Authentizität des Zentrums**

Lateinamerikanische Blicke auf Paris 1968

Michael Rössner | 89

## **AUTHENTIZITÄT IN DEN KÜNSTEN**

### **Das Authentische in der Literatur und der platonische Schatten**

Poetik der Epiphanie bei Hugo von Hofmannsthal  
und James Joyce

Michael Böhler | 119

### **Erfindung der Authentizität – Authentizität des Erfundenen**

Eine literarische Paradoxie als Herausforderung  
der Editionswissenschaft

Hermann Blume | 143

### **Was ist „das Werk selbst“?**

Zum Problem der Authentizität in der  
musikalischen Aufführungspraxis

Hans-Joachim Hinrichsen | 159

### **Die Masken der Authentizität**

Von D. A. Pennebakers „Don't Look Back“  
zu Todd Haynes „I'm Not There“

Siegfried Mattl | 175

## **AUTHENTIZITÄT ALS ELEMENT (NATIONALER) IDENTITÄTSKONSTRUKTIONEN**

### **Zur Authentizitätsproblematik von Nationaltrachten im 19. und 20. Jahrhundert**

Ostmitteleuropa in vergleichender Perspektive

Rudolf Jaworski | 187

### **Barock in Böhmen – tschechischer Barock?**

Ein Authentisierungsdiskurs und sein Scheitern

Michaela Marek | 205

## **Burgtheaterdeutsch**

Stabilitätsstrategie und Differenzmarkierung

Elisabeth Großegger | 237

## **Orte und Lebenszeugnisse**

„Authentizität“ als Schlüsselkonzept in der Vermittlung  
der NS-Verfolgungs- und Vernichtungspolitik

Heidemarie Uhl | 257

## **Personenregister** | 285

## **Autorinnen und Autoren** | 291

## Vorwort

---

MICHAEL RÖSSNER, HEIDEMARIE UHL

Der Begriff der Authentizität hat seit längerer Zeit Konjunktur: In Zeiten von „virtual reality“ und „postmoderner Beliebtheit“ scheint er – nicht ohne Nostalgie – wieder einmal zum Sehnsuchtsort geworden zu sein: „Unberührte Natur“ im Tourismus, „Zurück zum Ursprung“ als Slogan einer Bio-Marke, „authentische Aufführungspraxis“ in der reproduzierenden Kunst sind Ausdruck dieser Sehnsucht. Und auch die Wissenschaft hat sich der Authentizität bemächtigt: Ausgehend von Theodor W. Adornos geradezu exzessiver Verwendung des „Authentischen“ auch im Superlativ (siehe den Beitrag von Michael Böhler in diesem Band) haben Literatur-, Kultur- und Sozialwissenschaftler wie Susanne Knaller, Harro Müller, Karl-Heinz Bohrer, Charles Taylor oder Alessandro Ferrara die Untersuchung verschiedener Aspekte dieses schillernden Begriffs unternommen und ihn in historische und logische Bedeutungsfelder sozusagen „aufgefächert“.

Freilich: Authentizität zählt nicht eben zum Kanon kulturwissenschaftlicher Leitbegriffe – vielmehr wird damit ein Begriff aufgerufen, der – wie etwa auch „Wirklichkeit“ und „Wahrheit“ – durch den *cultural turn* seine Unschuld verloren hat: Vorstellungen von Echtheit, Eigentlichkeit, Unmittelbarkeit, Ursprünglichkeit sind gesellschaftlich bedingte, kontingente Konstrukte, die kommunikativ generiert und im Rahmen von Machtbeziehungen verhandelt werden. Und selbst die „personale Authentizität“ im Rahmen der Subjektkonstitution der Moderne erweist sich als ein unerreichbarer Fluchtpunkt, wie etwa der italienische Autor Luigi Pirandello schon in seinem Roman „Einer, keiner, hunderttausend“ (1925) vorführt: Der Erzähler-Protagonist ver-

sucht dort, vor dem Spiegel stehend, seinen Körper authentisch, „uninszeniert“ so zu sehen, wie ihn die anderen sehen – das gelingt freilich nur im „animalischen“ Augenblick der Explosion eines Nissens, bei dem der Körper sich der Kontrolle des ihn beobachtenden Ichs entzieht.

Ungeachtet der Dekonstruierbarkeit des Begriffs verbindet sich mit Authentizität allerdings nach wie vor ein Schlüsselkonzept individueller, kultureller, nicht zuletzt auch wissenschaftlicher Praxis. In den Kunstwissenschaften, der Editionswissenschaft, in der Text- und Quellenkritik, aber auch in der Ethnologie werden unterschiedliche Konzeptionen von Authentizität nach wie vor diskutiert. Die Fixierung eines „authentischen“ historischen Zustandes bildet darüber hinaus die Grundlage vielfältiger Anwendungsformen – von der Restaurierung von Kunstwerken bis hin zur musikalischen Aufführungspraxis oder zum Denkmalschutz.

Teilt Authentizität somit das Schicksal jener Begriffe, die zwar auf theoretischer Ebene „dekonstruiert“ werden, deren Relevanz davon allerdings wenig beeinträchtigt wird? In gegenwärtigen kulturwissenschaftlichen Debatten erfahren Begriffe wie Authentizität, Evidenz, Wirklichkeit, Wahrheit, Fragen nach dem Eigensinn von Bildern, der Magie von Dingen offenkundig eine neue Aufmerksamkeit.

In diesem Spannungsfeld zwischen Dekonstruktion und neuer Aufmerksamkeit versucht der vorliegende Band, ein breites Spektrum von Er-/Findungen von Authentizität zur Diskussion zu stellen. Auch dieser Ansatz ist kulturwissenschaftlicher und daher transdisziplinärer Natur, und es konnte nicht ausbleiben, dass ein so kontroverser Begriff nicht nur in seinen konkreten Applikationen beleuchtet, sondern auch grundsätzlich in Frage gestellt wird. Der erste Abschnitt widmet sich daher den verschiedenen (und bisweilen durchaus gegensätzlichen) Varianten der Begriffsverwendung. Wenn Sybille Krämer die beiden Hauptvarianten (die bei ihr „personale“ und „materiale“ Authentizität heißen) in letzter Instanz doch wieder als auf einander verweisend zusammenführen kann, zeigen die Beiträge von Aleida Assmann und Anil Bhatti die Problematik eines einheitlichen europäisch geprägten Authentizitätsbegriffs in einer postkolonialen Umgebung auf, die Michael S. Falser in das konkrete Gebiet von Denkmalschutz und Rechtsvorschriften für die Bewahrung von Kulturerbe übersetzt. In Michael Rössners Beitrag schließlich wird dieser problematische Export des europäischen Authentizitätsbegriffs an die Peripherie (Latein-

amerika) verfolgt, wodurch Authentizität sozusagen einen exotischen Charme bekommt – bis die Peripherie nach 1968 „zurückschreibt“.

Spezifischer auf diese literarische Ausprägung von Authentizität, die schon in den Beiträgen von Assmann, Bhatti und Rössner verfolgt wird, geht dann Michael Böhlers Beitrag ein, der den zweiten Abschnitt, der dem Authentizitätsbegriff in den Künsten, wo er vor allem von Adorno verortet worden war, einleitet. Aber die Spezifität der Auseinandersetzung mit den Begriffen „authentisch“ und „Epiphanie“ bei Joyce und Hofmannsthal verhindert nicht, dass dieser Beitrag noch einmal, sozusagen als Klammer zwischen dem ersten und zweiten Teil, in grundlegender Form und von Plato ausgehend die Frage nach dem Wesen und den Arten des Authentischen schlechthin stellt. Vom Inhalt zur Textgestalt transferiert der folgende Beitrag von Hermann Blume den Begriff der Authentizität, indem er aus editorischer Perspektive die Frage nach der Gültigkeit des „authentischen“ Texts stellt – und hier wie bei dem folgenden Beitrag von Hans-Joachim Hinrichsen zur musikalischen Aufführungspraxis wird die Problematik des Begriffs selbst bei seiner Anwendung auf scheinbar unhinterfragbare Materialität sichtbar. Wenn Hermann Blume die „magische“ Wirkung der Authentizität aus dem Zusammenwirken von „Authentifizierung“ und Aura erklärt, so scheint Siegfried Mattls Beitrag zu zwei Bob Dylan-Filmen geradezu die progressive Dekonstruktion dieser Aura zu exemplifizieren.

Ausgangspunkt der hier dokumentierten Tagung und damit auch dieses Bandes war die besondere Rolle, die dem Begriff des „Authentischen“ im Rahmen der Herstellung und Bewahrung des kollektiven kulturellen Gedächtnisses zukommt, das seit rund einem Jahrzehnt einen Schwerpunkt der Forschungen des Instituts für Kulturwissenschaften und Theatergeschichte an der Österreichischen Akademie der Wissenschaften darstellt. Elemente dieses kulturellen Gedächtnisses sind, wie sehr es sich auch immer um Konstrukte handeln mag, stets bestrebt, Echtheit, Ursprünglichkeit, Authentizität zu behaupten und für sich zu inszenieren, das heißt auch und nicht zuletzt, medial zu übersetzen. Der unaufhebbare Widerspruch, in den dies mündet (die „inszenierte Authentizität“) wird in mehreren Beiträgen dieses Bandes thematisiert. Die Rolle des „Authentischen“ für die Konstruktion kollektiver (vor allem nationaler) Identitäten ist Gegenstand des letzten Abschnitts, in dem Rudolf Jaworski die Authentizität von Trachten vor

dem Hintergrund ihrer politischen Indienstnahme in Frage stellt, Michaela Marek der nationalen Instrumentalisierung von Baustilen nachgeht und in zwei im engeren Sinn auf Österreich bezogenen Beiträgen Elisabeth Großegger die Implikationen des Burgtheaterdeutsch für österreichische und andere Identitäten und Heidemarie Uhl das Problem des Authentischen im Zusammenhang von narrativen und materiellen Zeugnissen der NS-Verbrechen untersucht.

Insgesamt zeigen die Beiträge des vorliegenden Bandes also nicht nur die Vielfalt der (oft gegensätzlichen) Verwendung des Begriffs, sondern vor allem die Prozesshaftigkeit des Authentischen, die sich in zahlreichen (kulturellen) Übersetzungen zwischen Diskursen und Epochen manifestiert. Eine „authentische Interpretation“ (was in der Rechtswissenschaft der weitgehend verbindlichen Auslegung von Rechtsvorschriften durch den Gesetzgeber entspräche) des Authentizitätsbegriffs kann nicht Aufgabe der kulturwissenschaftlichen Forschung sein. Das Bewusstmachen seines dynamischen, prozesshaften Charakters, die Dokumentation des konfliktiven Verhandelns der Zuschreibungen, die er bei den kulturellen Übersetzungen zwischen verschiedenen Diskursen und Epochen erfährt, ist hingegen ein Gebot der Stunde, insbesondere in einem zunehmend hybriden, „globalisierten“ kulturellen Umfeld. Hierzu versucht der vorliegende Band einen Beitrag zu leisten.
